# Supplementary material for: Poincaré Plot Area of Gamma-Band EEG as a Measure of Emergence From Inhalational General Anesthesia
Source: PubMed Central journal article supplement (PMC7900422; doi:10.3389/fphys.2021.627088), 2021-02-09

# A adult\_SEV

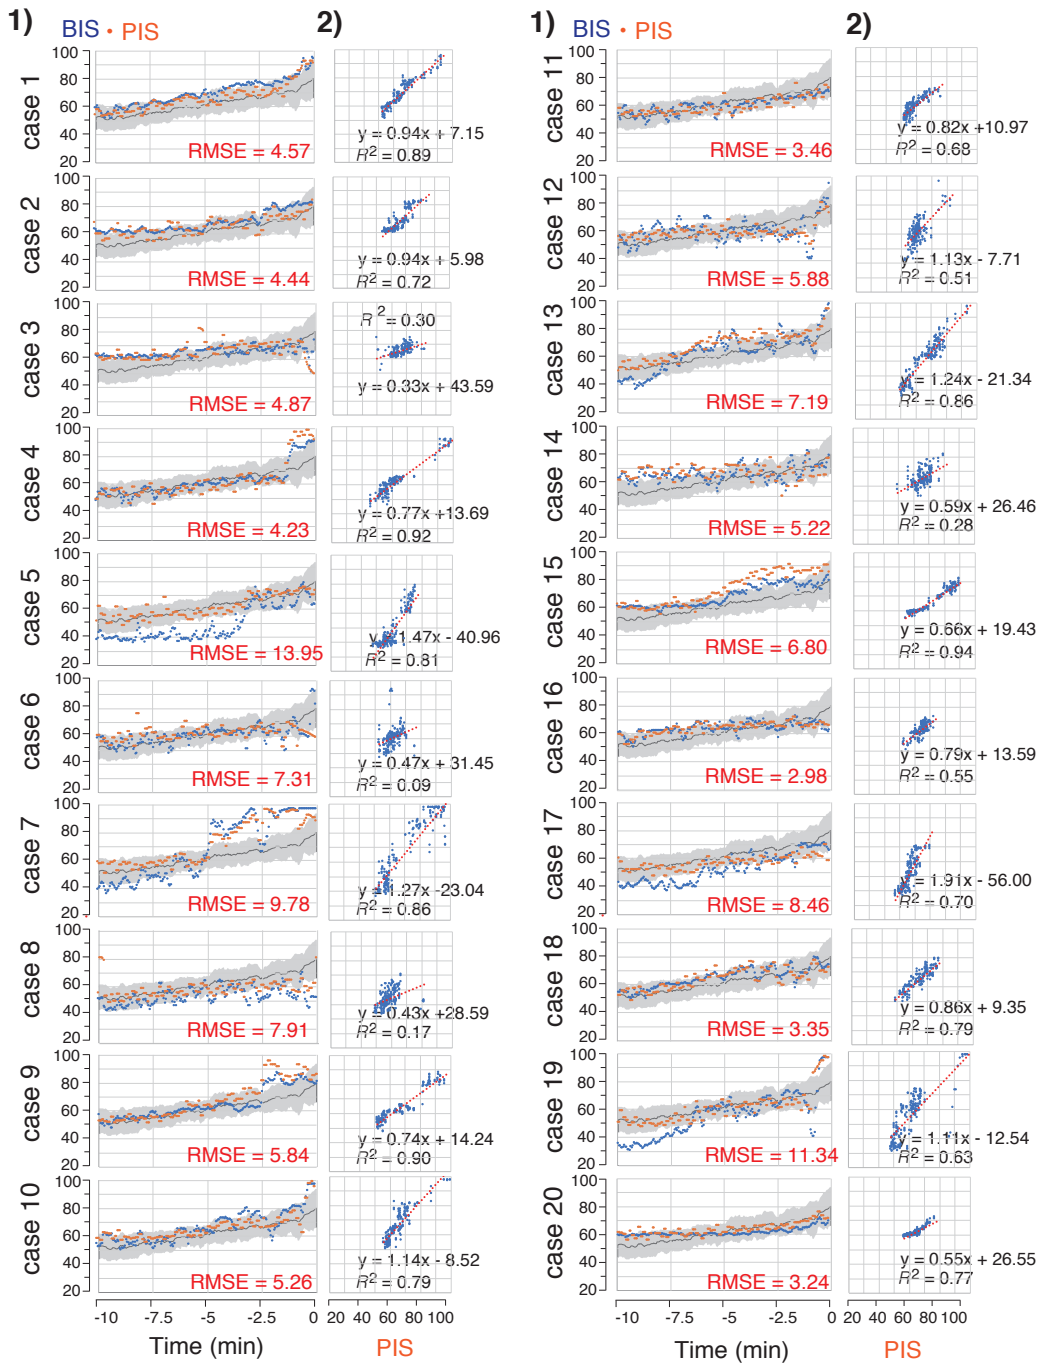

## 3) averages of 20 cases

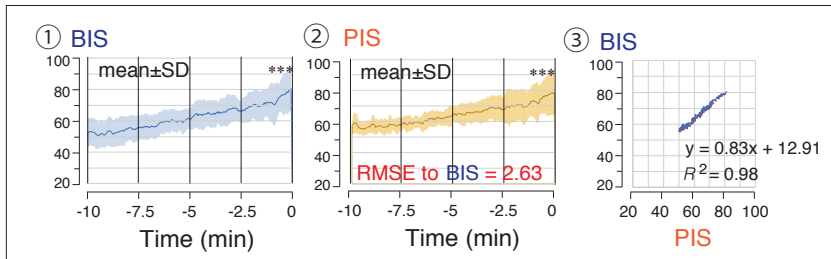

## B adult\_DES

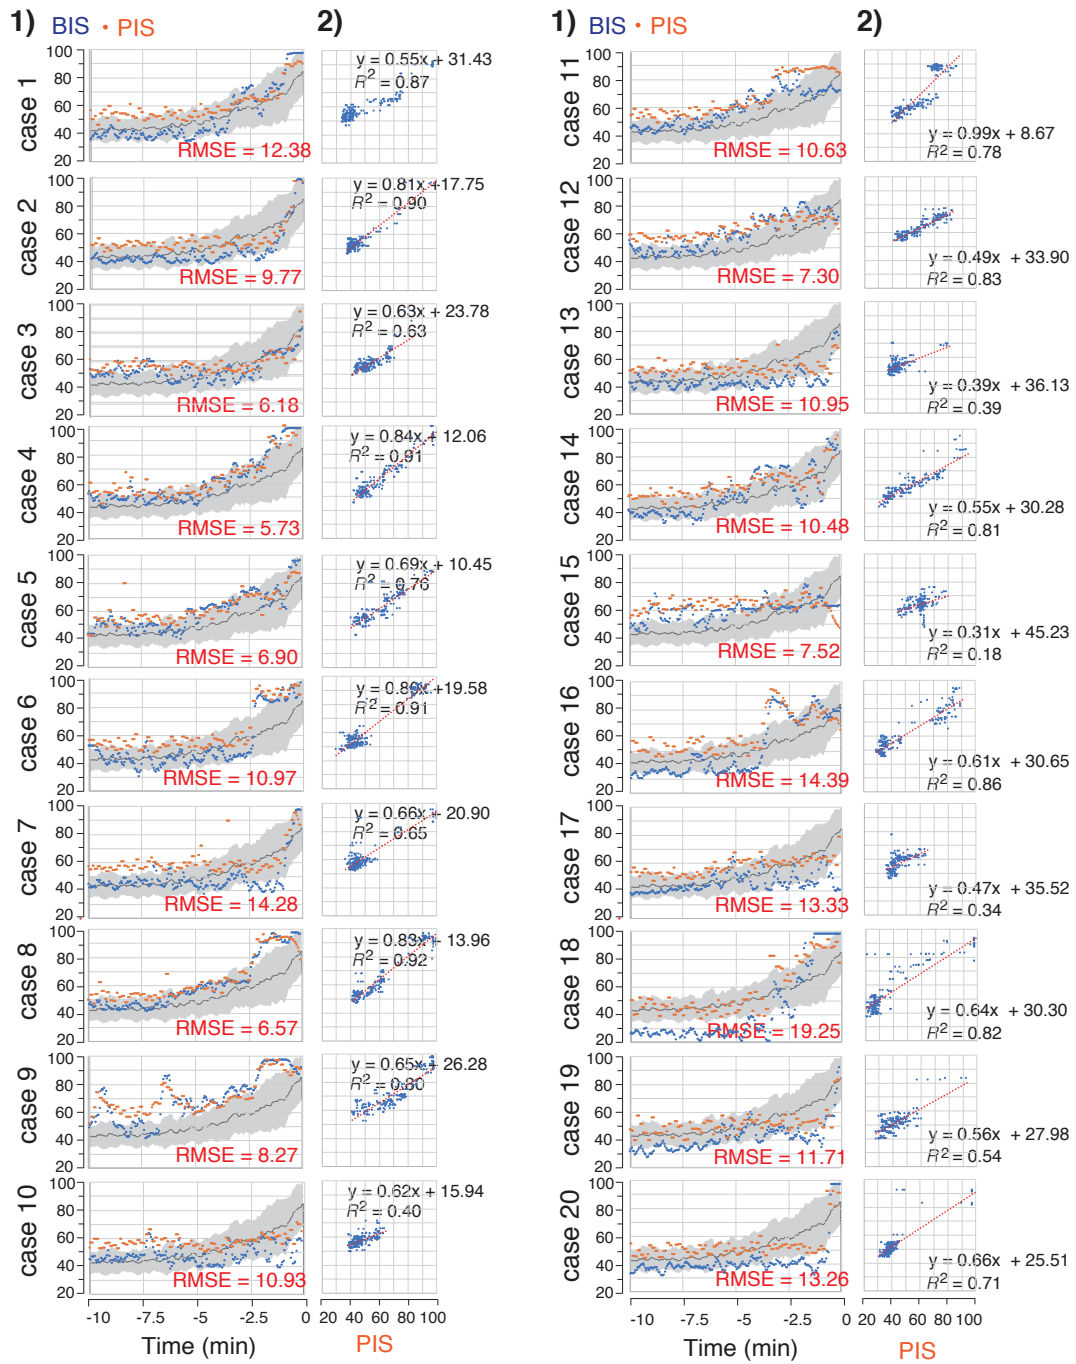

### 3) averages of 20 cases

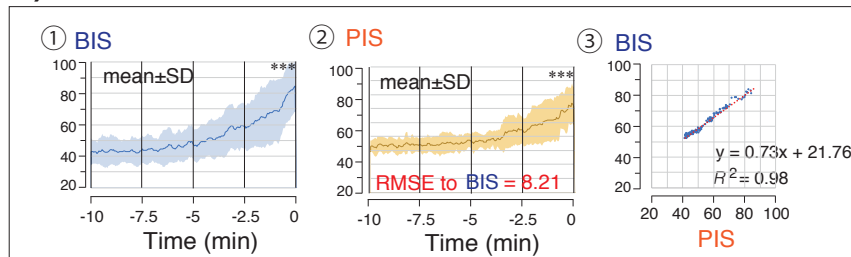

### C ped\_sev

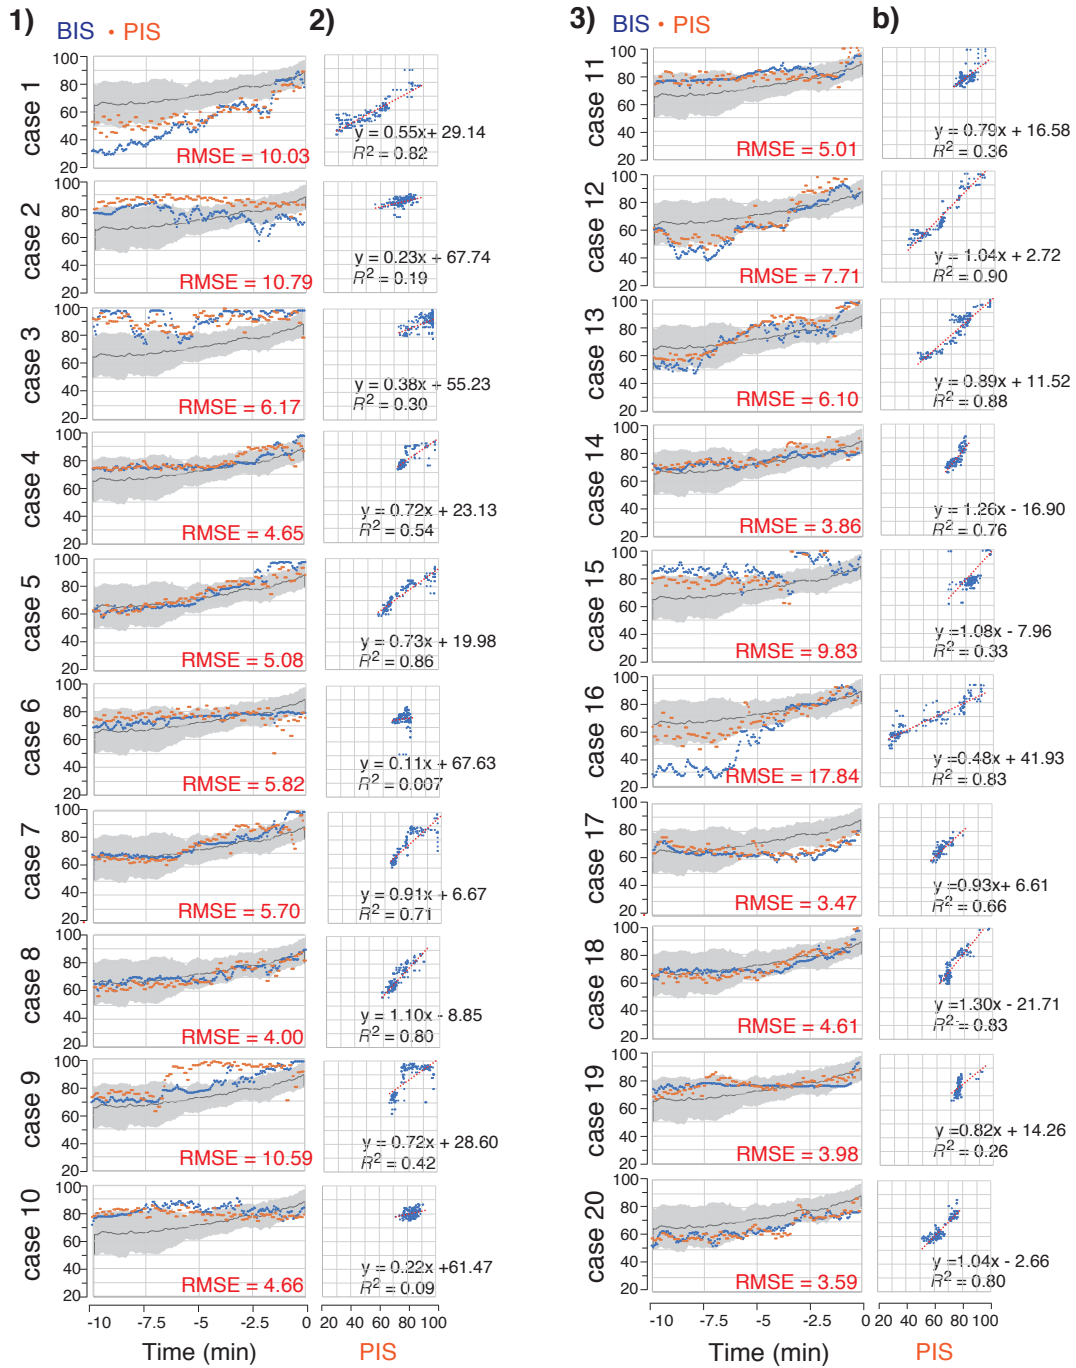

### 3) averages of 20 cases

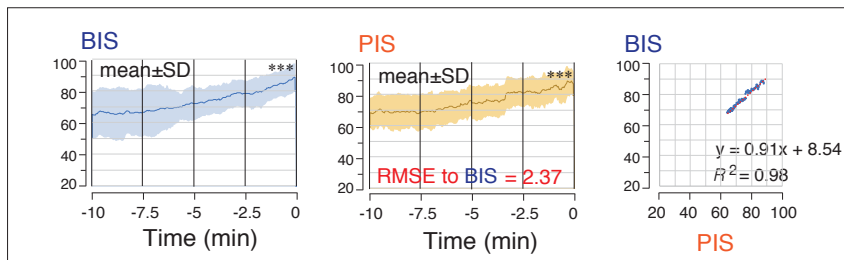

Supplement: Image_3.pdf [file Image_3.pdf]
